# Supplementary material
Source: publisher site journal article supplement (https://www.dovepress.com/get_supplementary_file.php?f=445788.docx)
Supplement: Supplementary file 1 [file get_supplementary_file.php]

Supplementary file


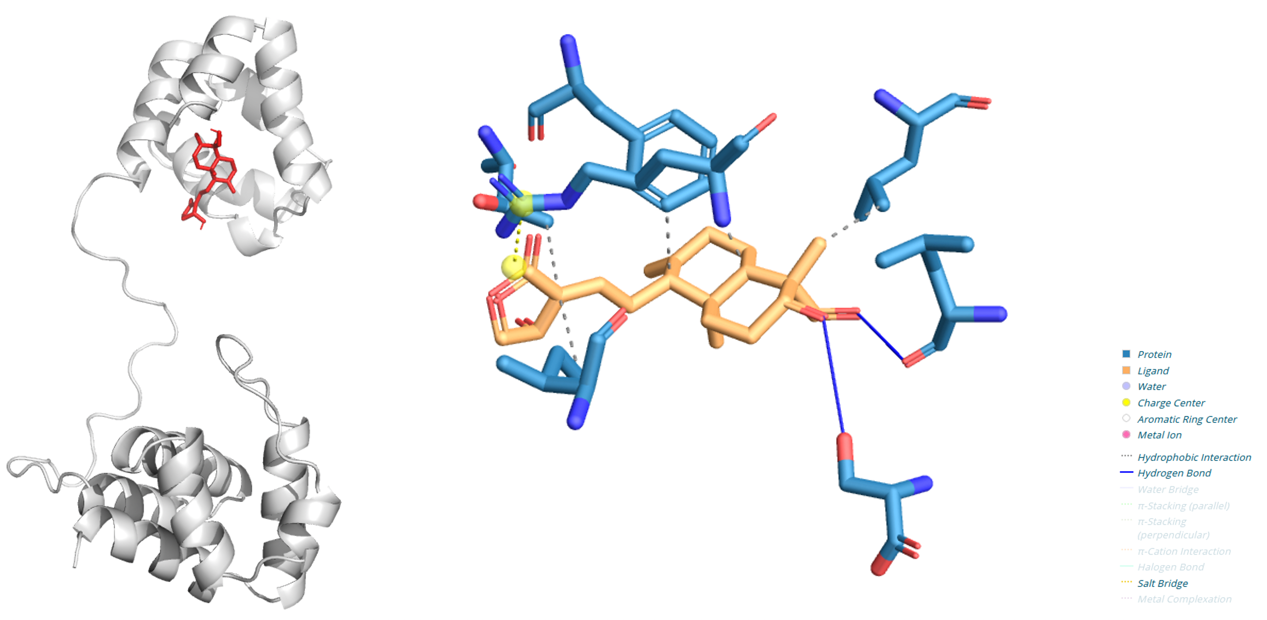


**Figure S1** Representative 3D binding model and 2D model of AGP to ASC.


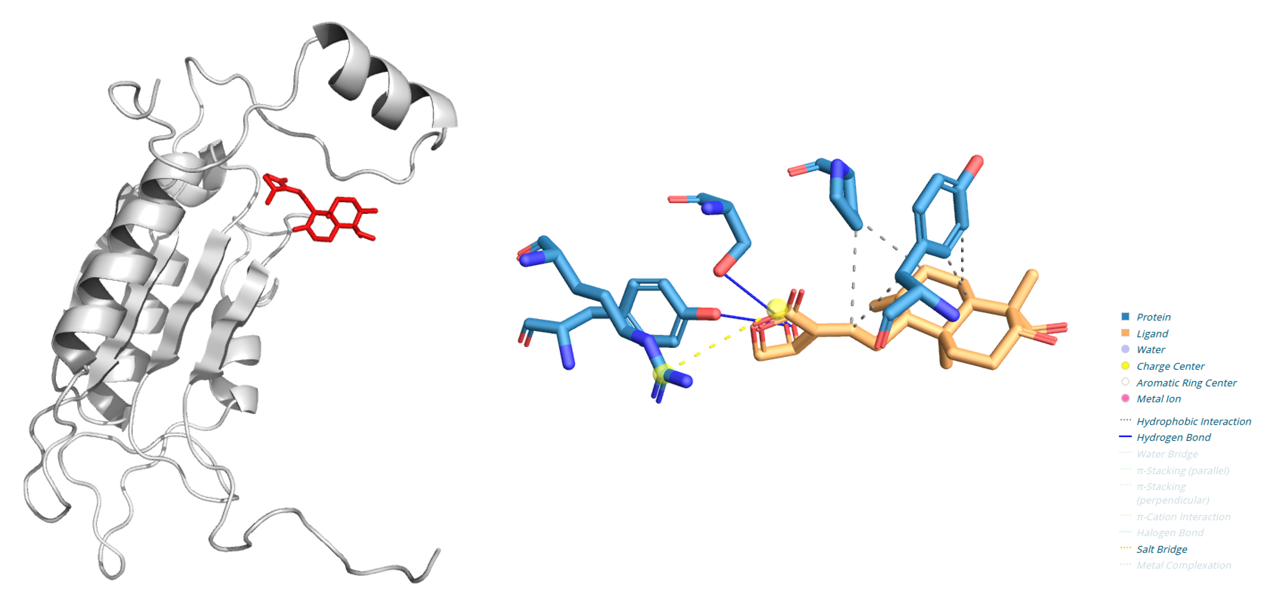


**Figure S2** Representative 3D binding model and 2D model of AGP to Caspase-1.


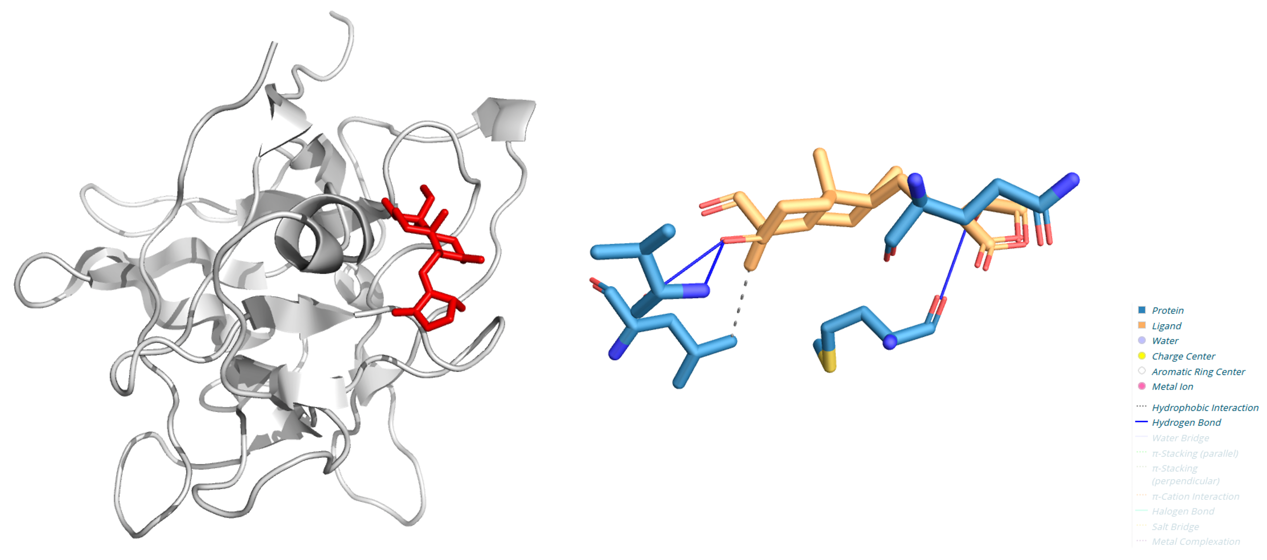


**Figure S3** Representative 3D binding model and 2D model of AGP to IL-1β.


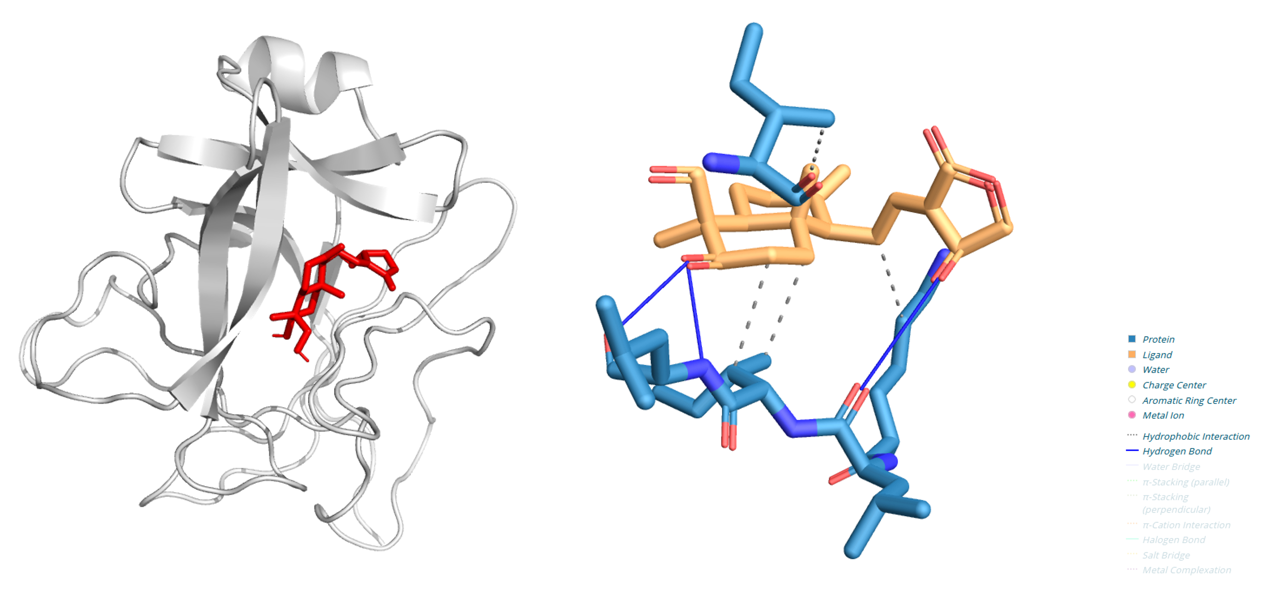


**Figure S4** Representative 3D binding model and 2D model of AGP to IL-18.
